# Supplementary material for: Mining Milk for Factors which Increase the Adherence of Bifidobacterium longum subsp. infantis to Intestinal Cells
Source: PubMed Central journal article supplement (PMC6306836; doi:10.3390/foods7120196), 2018-12-03
Supplement: foods-07-00196-s001.pdf [file foods-07-00196-s001.pdf]

## Supplementary Information

**Table SI:** Significant differences in growth of *B. infantis* following 1 hour incubation with the milk derived components.

| Powder†    | Percentage Difference | Significance |
|------------|-----------------------|--------------|
| $\beta$ -C | 65%                   | 0.053*       |
| $\beta$ -L | -7%                   | 0.037*       |

\*Results for individual powders are represented as the average of three experimental replicates.

† HMO, GMO, BMO, 3' & 6' SL P95, GMP, LF, MFGM-10, PL-20, BF and IGEP did not result in a significant difference in growth of *B. infantis* following 1 hour incubation
